# Supplementary material for: Gold nanorodassembly based approach to toxin detection by SERS
Source: Royal Society of Chemistry journal article supplement (doi:10.1039/c2jm15238j), 2011-12-23
Supplement: c2jm15238j.pdf [file c2jm15238j.pdf]

## Supporting Information

### Gold nanorod assembly based approach to toxin detection by SERS

Yingyue Zhu<sup>#</sup>, Hua Kuang<sup>#</sup>, Liguang Xu<sup>#</sup>, Wei Ma, Chifang Peng, Yufei Hua, Libing Wang<sup>\*</sup>,  
Chuanlai Xu<sup>\*</sup>

*School of Food Science & Technology, State Key Lab of Food Science & Technology, Jiangnan University, Wuxi,  
214122, China*

### Experimental Section

#### *1. Materials and Apparatus.*

Hydrogen tetrachloroaurate (III) hydrate, thioctic acid, 4-aminothiophenol and cetyltrimethylammonium bromide (CTAB) were obtained from Sigma-Aldrich and used as received. MC-LR was purchased from Express Technology Co., Ltd. (China). All other reagents were available commercially. The antibodies to MC-LR were prepared in our laboratory following immunization of New Zealand rabbits (Nie et al., 2008). The antigen were prepared by coupling MC-LR to ovalbumin (OVA) using the glutaraldehyde (GDA) coupling method. Milli-Q ultra-pure water (18.2 MΩ) was used in all experiments.

UV-vis spectra were obtained using the Unico 2100PC UV-vis instrument. Transmission electron microscopy (TEM) was performed using a JEOL JEM-2100 transmission electron microscope. A typical sample was prepared by dropping 10 μL of the nanorods solution onto carbon/formvar coated copper grids. The grids were

---

<sup>#</sup> These authors contributed to this paper equally.

<sup>\*</sup> Corresponding author: Tel: +86-510-85329076; Email: wanglb1@163.com, xcl@jiangnan.edu.cn

subsequently dried in air and imaged. Raman spectra were recorded using a LabRam-HR800 Micro-Raman spectrometer with Lab-spec 5.0 software attached to a liquid cell. The slit and pinhole were set at 100 and 400  $\mu\text{m}$ , respectively, in a confocal configuration with a holographic grating (600  $\text{g}/\text{mm}$ ) and an air-cooled He-Ne laser for 632.8 nm excitation with a power of ca. 8 mW.

## *2. Modification of the MC-LR antibody and antigen.*

Modification of the antibody (m-Ab) to MC-LR and antigen (MC-LR-OVA) (m-Ag) were prepared as follows: The carboxyl group of thioctic acid (TA) was activated by 1-ethyl-3-(3-dimethylaminopropyl)-carbodiimide (EDC) and linked with the amine group of the antibody and antigen. Briefly, 0.15 mL of TA ethanol solution (100 mM) was mixed with 0.2 mL of sulfo-N-hydroxysuccinimide (sulfo-NHS) (100 mM) and 0.2 mL of EDC (100 mM). After reacting for 15 min, the mixture was added dropwise to 2.08 mL of Ab (7.47 mg/mL, 48  $\mu\text{M}$ ) and mixed gently by inversion. This solution was reacted at room temperature for 4 h. After this, the conjugate was dialyzed against PBS (0.01 M, pH 7.4) for the next 3 days at 4°C, changing the dialysate three times each day. The m-Ab was stored at 4°C. The method of preparing m-Ag was similar to the method used to modify the antibody.

## *3. Synthesis of Gold Nanorods.*

All glassware used was cleaned with freshly prepared aqua regia and rinsed thoroughly in  $\text{H}_2\text{O}$  prior to use. GNRs with an aspect ratio of about 3 were prepared from a slightly modified seed-mediated growth procedure described by El-Sayed and Murphy. Cetyltrimethylammonium bromide (CTAB, 99%) and sodium borohydride, L-ascorbic acid, hydrogen tetrachloroaurate(III) trihydrate ( $\text{HAuCl}_4$ ) (99%), and silver

1 nitrate were all purchased from Sigma-Aldrich. Milli-Q ultra-pure water (18.2 MΩ)  
2 was used in all experiments.

3 Initially, 0.1 mL of a 5 mM HAuCl<sub>4</sub> solution was added to 1 mL of 0.20 M CTAB  
4 solution which was kept at a constant temperature of 28.0°C. Immediately, a deep  
5 orange color appeared. Then, 0.12 mL of freshly prepared 0.01 M NaBH<sub>4</sub> solution  
6 was quickly added to the solution and mixed by inversion. The solution was rapidly  
7 stirred for 2 min, and the color of the solution turned pale brown. Upon seed  
8 production, the GNRs were fabricated. 5 mL of 0.005 M HAuCl<sub>4</sub> was added to 5 mL  
9 of 0.2 M CTAB solution and then 4 mL of water was added, which was the GNRs  
10 growth solution. To this mixture, 65 μL of 0.1 M ascorbic acid was added followed by  
11 0.125 mL of 0.01 M AgNO<sub>3</sub> solution which was mixed by inversion for about 2 min.  
12 The solution became colorless. Finally, 0.05 mL of seed solution was added with  
13 gentle mixing by inversion for about 20 s. The GNRs were used after 4 h.

14

#### 15 *4. Fabrication of gold nanorod probes.*

16 The GNRs were centrifuged at 7500 rpm for 15 min in order to remove excess  
17 CTAB, Vc, AgNO<sub>3</sub> and small spherical particles. The GNRs were resuspended in an  
18 equivalent volume of 0.005 M CTAB solution (containing 0.1% SDS) at pH 3.8. The  
19 pH of the solution was adjusted using 1M HCl.

20 CTAB preferentially bound along the {100} facet of the longitudinal side of the  
21 nanorods. The {111} facets at the ends of the GNRs bound fewer CTAB, so they  
22 could conjugate the thiol-modified antibody and antigen. In order to conjugate  
23 antibody to GNRs, 0.5 mL of the redispersed GNRs solution was added dropwise into  
24 1.00 mL of diluted antibody solution, which was prepared from 50 μL of modified Ab  
25 solution at 7.47 mg/mL. This solution was reacted at room temperature for 4 h with

gentle shaking. After that, the probe was subsequently collected following centrifugation at 6000 rpm for 10 min (3 times). The washing buffer was 0.005 M CTAB solution (containing 0.1% SDS) at pH 3.8. The GNRs were redispersed in 50  $\mu$ L of washing buffer. The probe was stored at 4°C. Conjugation of the GNRs and modified antigen was carried out in a similar way. The only difference was that the concentration of modified antigen was prepared from a dilution of 60  $\mu$ L of modified antigen solution at 5.0 mg/mL with 940  $\mu$ L 0.005 M CTAB solution (containing 0.1% SDS) at pH 3.8.

Subsequently, 4-ATP ethanol solution (10  $\mu$ M) was added to the GNR-Ab and GNR-Ag solutions and incubated for 12 h, respectively. After that, the GNR-Ab and GNR-Ag solutions were centrifuged and redispersed in 50  $\mu$ L of washing buffer for the next step.

#### 5. Competitive immunoassay of MC-LR using GNR-Ab and GNR-Ag.

A volume of 20  $\mu$ L of GNR-Ag was mixed with 20  $\mu$ L of MC-LR standard solution at different concentrations with gentle shaking for 5 min. To each mixed solution, a 20  $\mu$ L volume of GNR-Ab was added and mixed well. Each mixture was reacted at 37°C for 10 min. The concentrations of the MC-LR standard were 0, 0.01, 0.05, 0.1, 1 and 5 ng/mL. After reacting, the sample was analyzed by TEM, UV-Visible spectrophotometry and SERS. A standard curve was established by plotting the Raman signal intensity against concentrations of MC-LR standard. The limit of detection (LOD) was calculated as  $LOD = 3.3SD/S$ , where SD is the standard deviation of the response and S is the slope of the calibration curve.

#### 6. Finite integration technique (FIT) Simulations of Plasmonic Properties:

1       Field enhancement properties of nanorod assemblies were calculated taking  
2    advantage of recently developed Finite integration technique (FIT) method. An FIT  
3    package from CST STUDIO SUITE™ 2010 utilizing the Drude model was used for  
4    the calculation in the vicinity of the plasmonic for media with electrical permittivity  
5    of  $\epsilon=1$  and magnetic permeability of  $\mu=1$ . The end to end assemblies were modeled  
6    by 16 nm (diameter) x 50 nm (length) NR by a gap of 15 nm. The electrical  
7    permittivity ( $\epsilon$ ) and plasma frequency ( $\omega_p$ ) of gold employed in the calculations were  
8    taken to be constant and equal to 1.0 and  $1.37 \times 10^{16}$  rad/s, respectively. The local  
9    electromagnetic fields were calculated for 632.8 nm excitation and parallel orientation  
10   of rods to the external field.

11

12

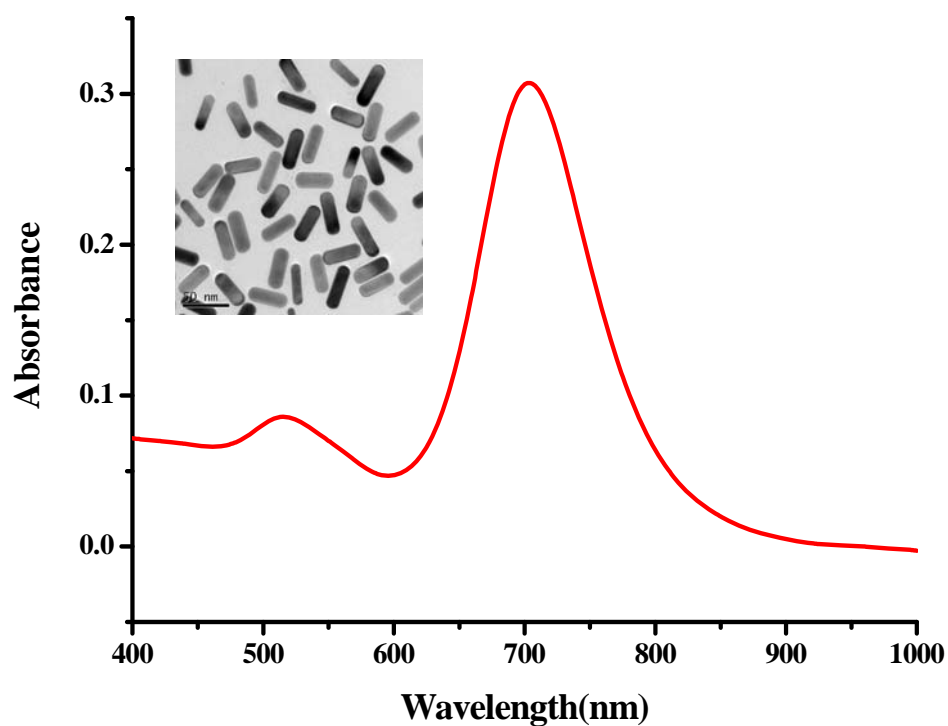

1

2 **Figure S1.** UV-Vis spectra of gold nanorods, representative TEM images of  
3 as-prepared gold nanorods. Scale bars represent 50nm.

4

5

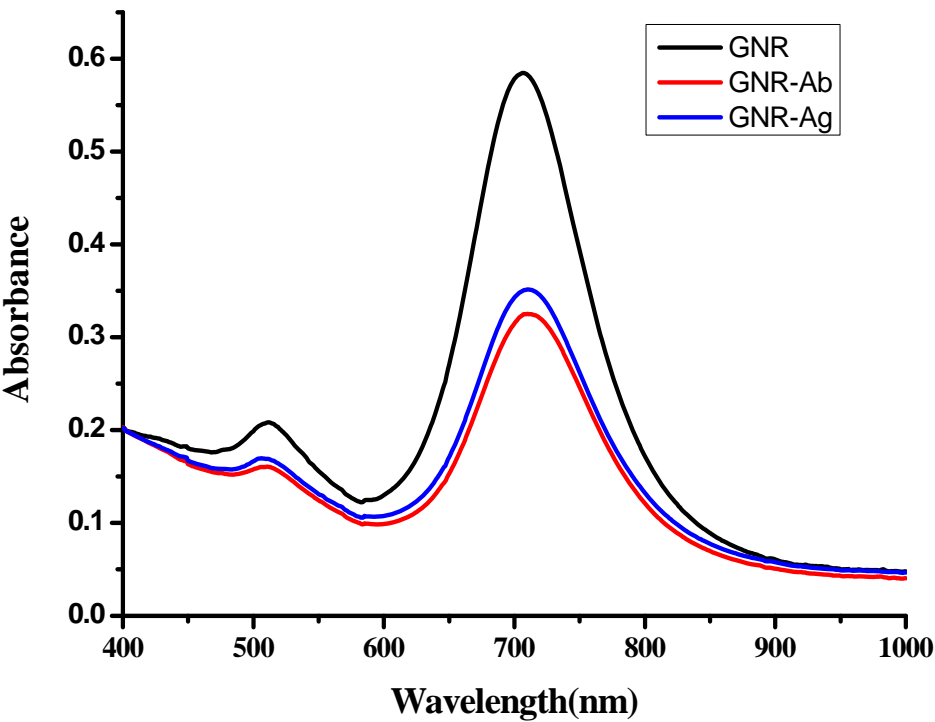

1

2 **Figure S2.** UV-vis spectra of gold nanorods, before and after the GNRs probes  
3 formation.

4

5

6

7

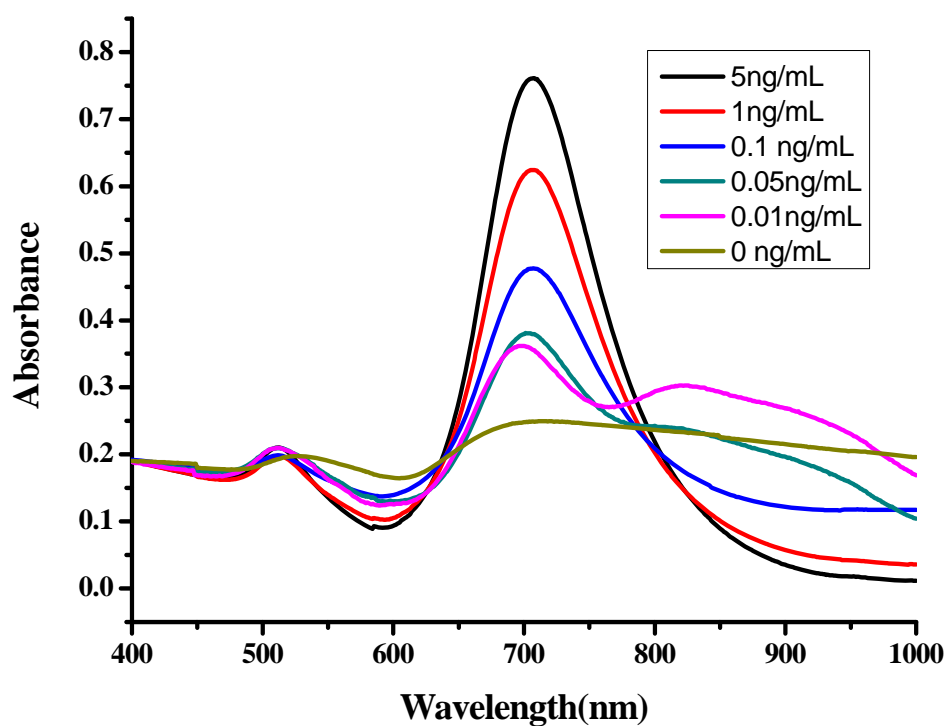

1  
2

3 **Figure S3.** UV-vis spectra of assembly of GNRs in solution that includes different  
4 concentrations of MC-LR at 37 °C.

5  
6  
7  
8  
9



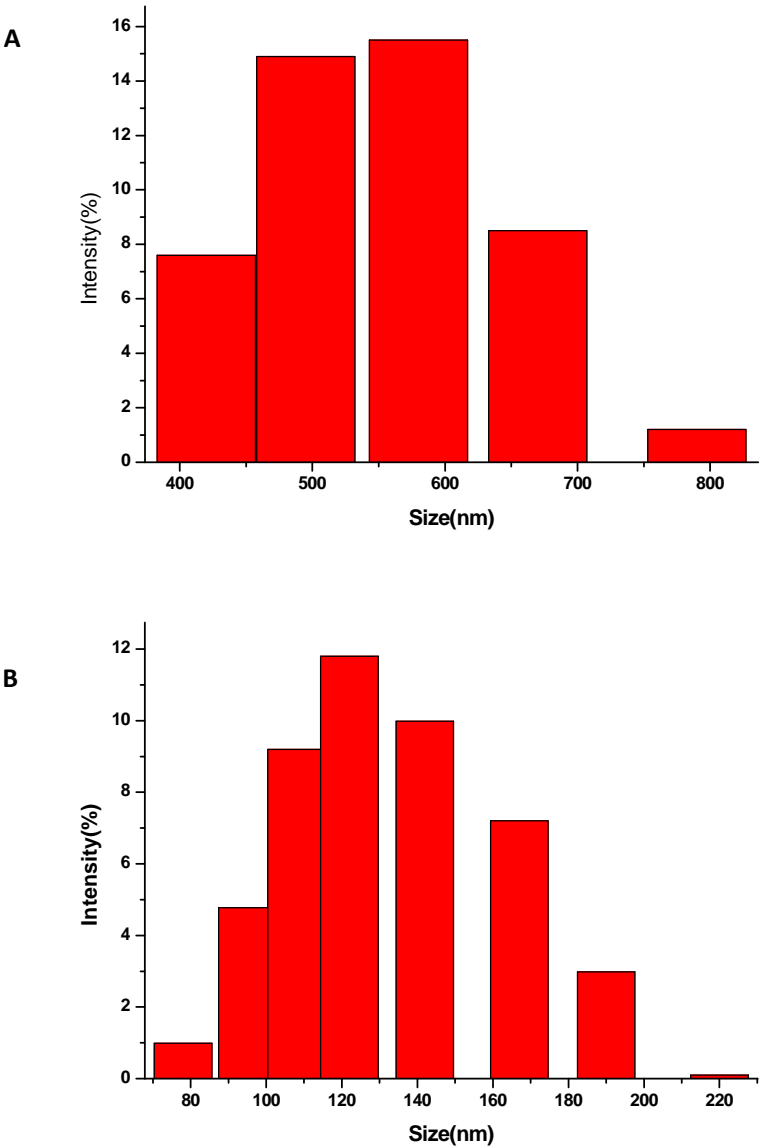

**Figure S4.** Typical size distributions of end-to-end assembly of Gold nanorods (A) without the addition of MC-LR and (B) with the addition of MC-LR at the concentration of 5.0 ng/mL.

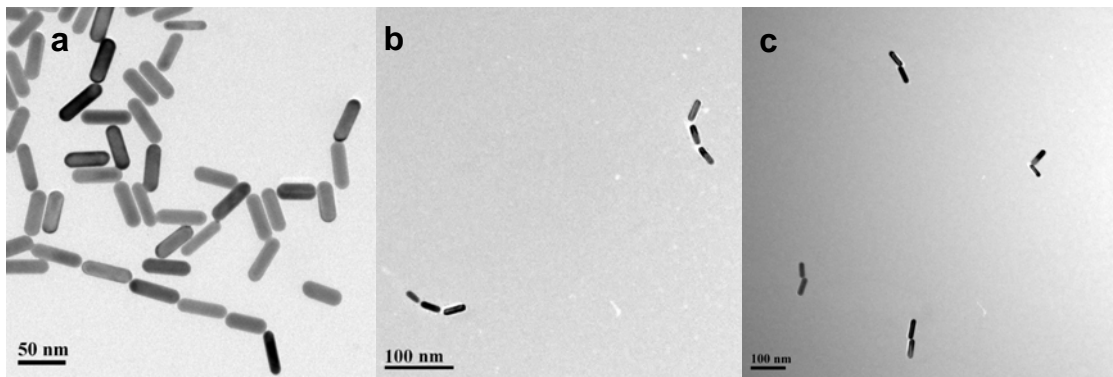

**Figure S5.** Lower magnification images of nanorods chains on addition of different concentrations of MC-LR. (a) 0ng/mL, (b) 1ng/mL, (c) 5ng/mL.

**Table S1** Detection results of real water samples

| Polluted water <sup>a</sup> | Original concentration | Spiked concentration | Detected concentration |                      |
|-----------------------------|------------------------|----------------------|------------------------|----------------------|
|                             | (ng/mL)                | (ng/mL)              | Mean±SD                | Recovery (%)         |
|                             |                        |                      | (ng/mL)                | Mean±SD <sup>b</sup> |
| 1                           | 0.27                   | 0.1                  | 0.34±0.03              | 93.21±3.08           |
| 2                           | 1.06                   | 0.2                  | 1.22±0.04              | 101.23±3.53          |
| 3                           | 0.76                   | 0.5                  | 1.32±0.04              | 105.19±2.89          |
| 4                           | 1.04                   | 1                    | 1.96±0.06              | 96.81±3.75           |
| 5                           | 1.69                   | 5.0                  | 6.42±0.14              | 96.07±3.85           |

<sup>a</sup> Different origin of water samples from six different areas of the Tai Lake

<sup>b</sup> SD was calculated based on three experiment for each sample.

**The detailed processes of the ELISA are as follows:**

1. Coat each well in a 96-well plate (Costar #9018) with 100 µL of a coating antigen solution.
2. Cover and rock overnight in an incubator at 4 °C.
3. Wash 3X with PBS-Tween 20 in vacuum-apparatus and pat dry.
4. The plate was blocked with 100µL (0.5%, w/v) OVA solution in PBS solution for 2 h at 37 °C.
5. Wash 3X with PBS-Tween 20.
6. Add 100 µL/well MC-LR at different dilutions or samples with 100µL/well pAb then incubate for 0.5 hour at 37 °C.
7. Wash 3X with PBS-Tween 20 and pat dry.
8. Dilute horseradish peroxidase-conjugated goat anti-rabbit IgG 1 : 3000 in PBS-Tween 20 for 0.5 hour and incubate as before.
9. Wash 6X as before and pat dry.
10. Prepare color substrate (TMB) and add 100 µL/well for 15 min in dark at room

1            temperature.

2        11.  $\text{H}_2\text{SO}_4$  (2 mol/L) was added to stop the reaction and record the absorption in a

3            micro plate reader at 450nm.

4

5

6

7
